# Supplementary material
Source: PubMed Central journal article supplement (PMC3761568)
Supplement: 1303669110_pnas.201303669SI.pdf [file 1303669110_pnas.201303669SI.pdf]

# Supporting Information

Lee et al. 10.1073/pnas.1303669110

## SI Materials and Methods

**Apoptosis PCR Array.** The human Apoptosis PCR Array (SABiosciences, catalog no. PAHS-012) was used as described in the manufacturer's protocol. Data analysis was performed using the manufacturer's software package.

**Mitochondria Isolation.** Mitochondria and cytosol fractions were separated according to the instructions included with the Qproteome Mitochondria Isolation Kit (Qiagen, catalog no. 37612).

**Real-Time PCR.** RNA extraction and cDNA synthesis were performed as described previously (63). Gene-specific primers were as follows: hOCT4 (5-GCAGCTCAGCCTTAAGAACA-3, 5-GGCAC TTCAGAAACATGGTC-3); hBIRC5 (5-GGACCACGCATCTCTACAT-3, 5-GCACTTTCTTCGCAGTTTCC-3); hBCL10 (5'-TCCTCTCCTTCTCCCCATT-3', 5'-GGCGTCCTTCTTCACTTCAG-3');  $\beta$ -actin (5-GTCCTCTCCCAAGTC-CACAC-3, 5-GGGAGACCAAAGCCTTCAT-3);  $\alpha$ -SMA (5-

AGAACATGGCATCATCACCA-3, 5-TACATGGCTGGGACATTGAA-3); hAFP (5-AGCTTGGTGGTGGATGAAAC-3, 5-TCTGCAATGACAGCCTCAAG-3); hBrachyury T (5-ACCAGTTTCATAGCGGTGAC-3, 5-CCATTGGGAGTACCCAGGTT-3); and hPAX6 (5-TGTCCAACGGATGTGTGAGT-3, 5-TTTCCCAAGCAAAGATGGAC-3).

**Caspase-3 Activity Assay.** The Ac-DEVD-AMC Caspase-3 Fluorogenic Substrate (BD Pharmingen) was used for assays performed according to the manufacturer's instructions.

**FACS Analysis.** For all of the FACS analysis, FACScalibur (BD Biosciences) and CellQuest software were used. Cells were stained using the PE Annexin V Apoptosis Detection Kit I (BD Pharmingen), FITC Rat Anti-SSEA-3 (BD Biosciences, catalog no. 560881), PE-Active Caspase-3 Apoptosis Kit (BD Biosciences, catalog no. 550914), and 7-aad (BD Biosciences, catalog no.559925) according to the manufacturer's instructions.

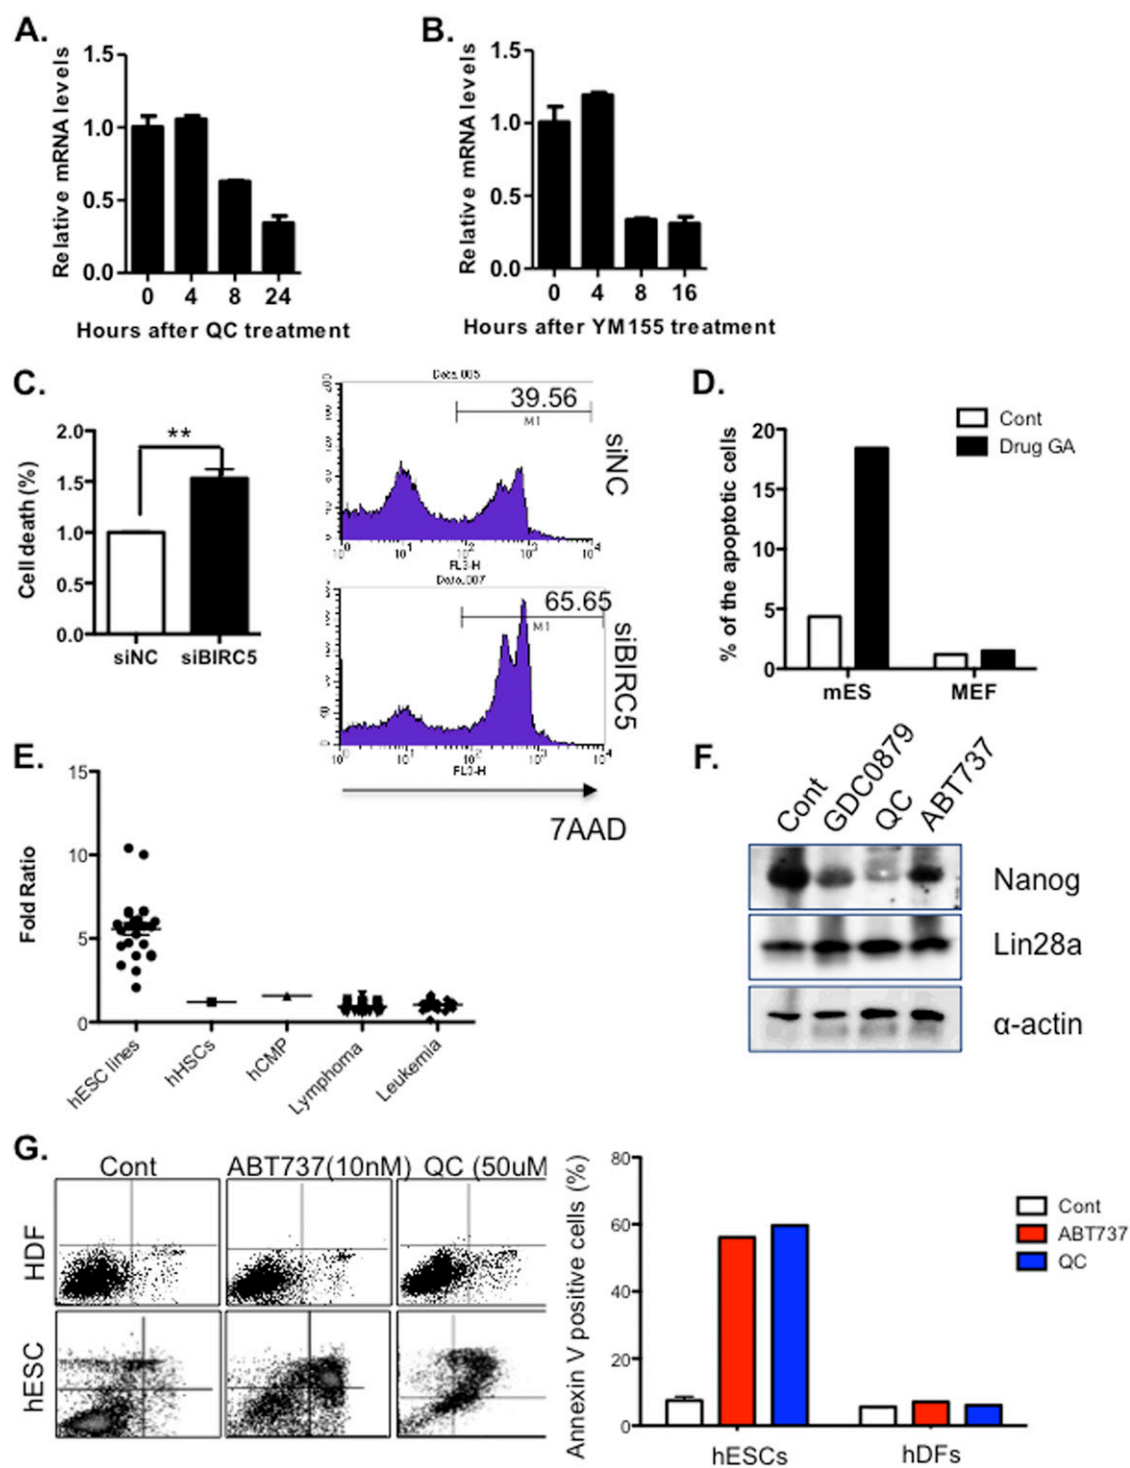

**Fig. S1.** hESCs were treated with 50  $\mu\text{M}$  of QC (A) or 10 nM of YM155 (B) and were harvested at the indicated time. *BIRC5* expression level was determined by real-time PCR analysis. (C) *BIRC5* in hESCs was suppressed by 50 nM of siControl (siNC) or si*BIRC5* using Dharmafect transfection reagent (catalog no. T-2001-01). Cell death rate was determined by FACS analysis stained with 7-aminoactinomycin D (7-AAD). FACS histogram (Right, with % of 7-AAD-positive population) and graphical image of cell death rates (Left).  $**P < 0.01$ . (D) mESCs (J1 cells) or mouse embryonic fibroblasts (MEFs) were treated with 50  $\mu\text{M}$  of gambogic acid (GA) for 24 h. Apoptotic population was determined by annexin V FACS analysis. Annexin V-positive population was graphically presented. (E) Expression level of *BIRC5* in hESC lines was compared with human hematopoietic stem cell (hHSCs), human common myeloid progenitor (hCMP), 70 lymphoma cell lines, and 33 leukemia cell lines revealed by a database search ([www.nextbio.com](http://www.nextbio.com)), and relative expression level was presented in the mean value of a scatter plot. (F) hESCs were treated with 10  $\mu\text{M}$  of GDC0879, 10  $\mu\text{M}$  of ABT737, and 100  $\mu\text{M}$  of QC for 24 h. Level of pluripotent markers, Nanog, and Lin28a was determined by immunoblotting analysis. Alpha-actin for loading control. (G) Flow cytometry plots of annexin V and 7-AAD staining after treatment with 10  $\mu\text{M}$  ABT737 and 50  $\mu\text{M}$  QC. Annexin V-positive cells were represented by bar graph.

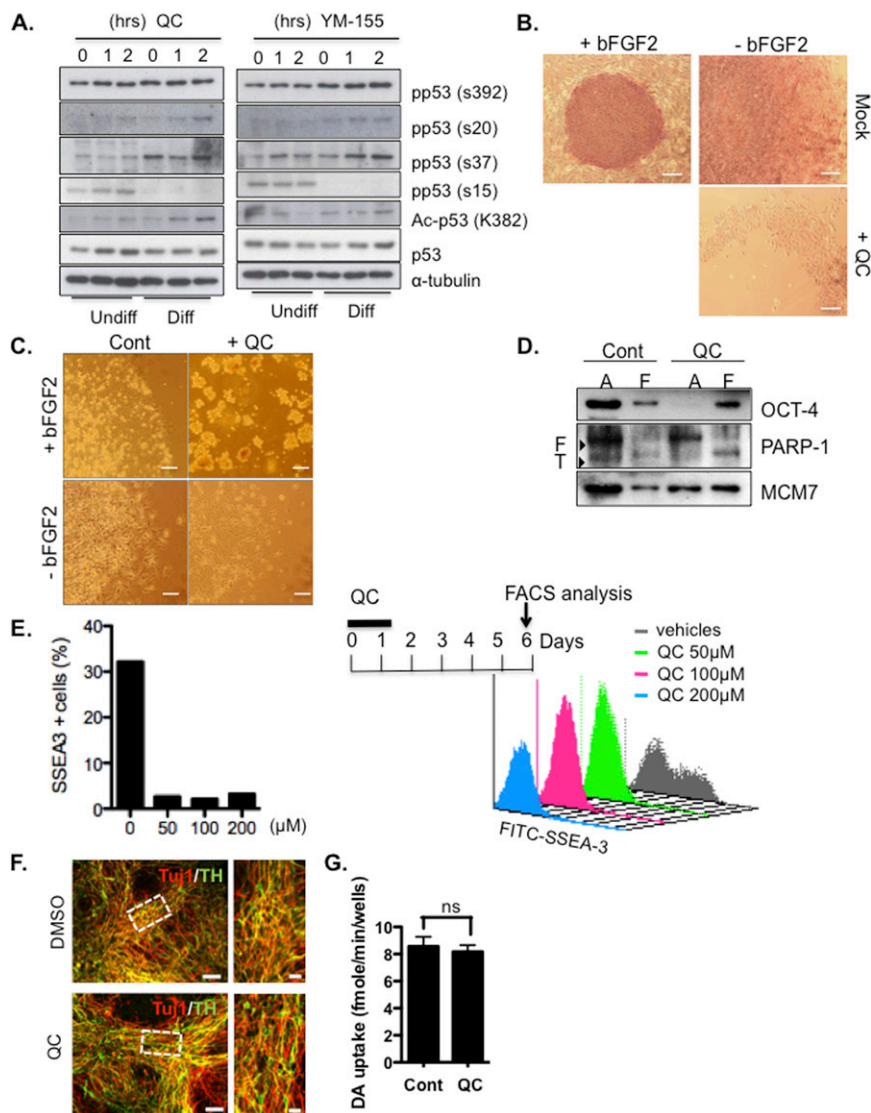

**Fig. S2.** (A) Human embryonic stem cells (hESCs) (Undiff) and spontaneous differentiated cells from embryoid bodies (EBs) of hESCs (Diff) were treated with either 50  $\mu$ M of quercetin (QC) (Left) or 10 nM of YM155 (Right) for 24 h, and then protein lysates were subjected to the immunoblotting for indicative p53 posttranslational modification (PTM) antibodies. Alpha-tubulin for equal loading control. (B) Alkaline phosphatase staining of hESCs cultured in the presence or absence of bFGF2 (6 d) with or without 50  $\mu$ M QC treatment for 24 h. (Scale bars, 200  $\mu$ m.) (C) Light microscopic image of hESCs cultured with (Left) or without (Right) bFGF2 for 6 d, treated with 50  $\mu$ M QC for 24 h. (Scale bars, 200  $\mu$ m.) (D) Differentiated cells were treated with QC and then separately harvested with adherent (A) or floating (F) hESCs before and after QC treatment were determined by immunoblotting. Poly (ADP ribose) polymerase-1 (PARP-1) cleavage (F, full length; T, truncated) was used as a marker of apoptosis, and minichromosome maintenance complex component 7 (MCM7) was used to verify equal loading. (E) FACS analysis of stage-specific embryonic antigen-3 (SSEA-3)-positive cells in mixed cell population after an additional 5 d with a single treatment with the indicated dose of YM155 (24 h). The resulting SSEA-3-positive population is represented as a graph (Right). (F) Dopaminergic neuronal cells derived from hESCs were treated with 50  $\mu$ M of QC or vehicle for 24 h and were then subjected to dual immunostaining with Tuj1 (red) and tyrosine hydroxylase (TH) (green). (G) Dopamine uptake of dopaminergic neuronal cells treated with QC or vehicle (DMSO) for 24 h was determined by measuring incorporation of [ $^3$ H]-labeled dopamine using liquid scintillation. ns, not significant.

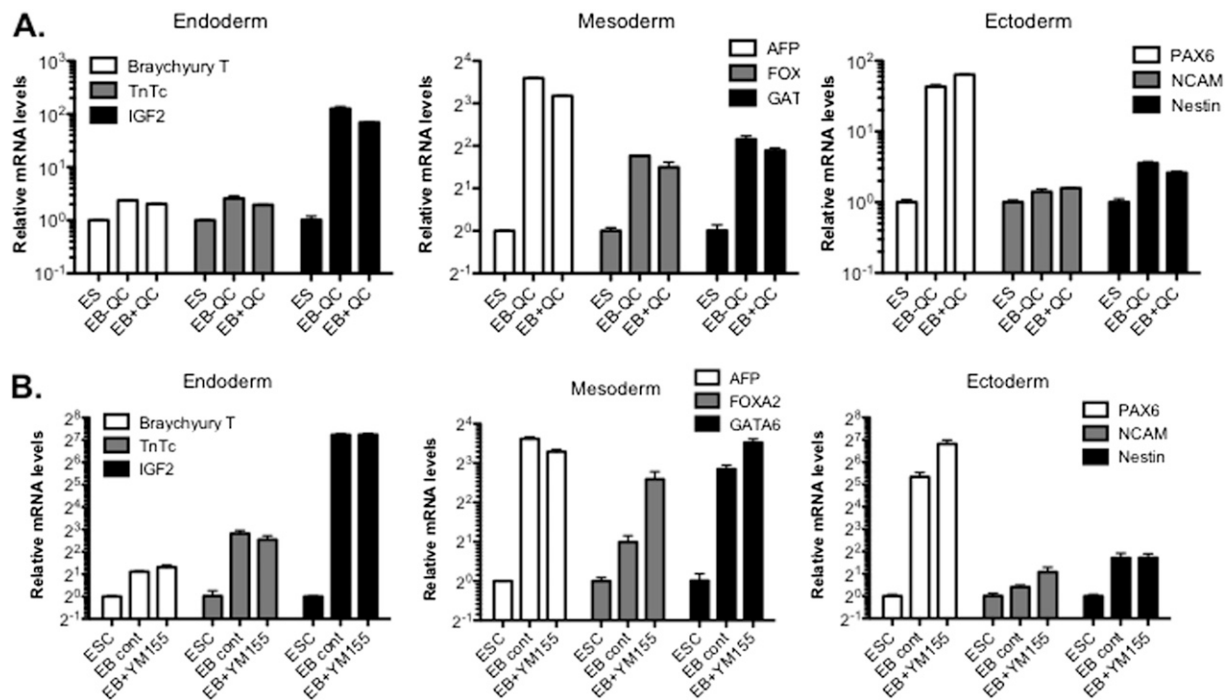

**Fig. S3.** Relative expression levels of lineage-specific differentiation markers (*AFP*, *FOXA2*, *GATA6* for endoderm; *Brachyury T*, *TnTc*, *IGF2* for mesoderm; and *PAX6*, *NCAM*, *Nestin* for ectoderm) of spontaneously differentiated hESCs in the presence (QC or YM155) or absence (NT) of 50  $\mu$ M QC (A) or 10 nM of YM155 (B) for 24 h, compared with undifferentiated hESCs, were analyzed by real-time PCR analysis.

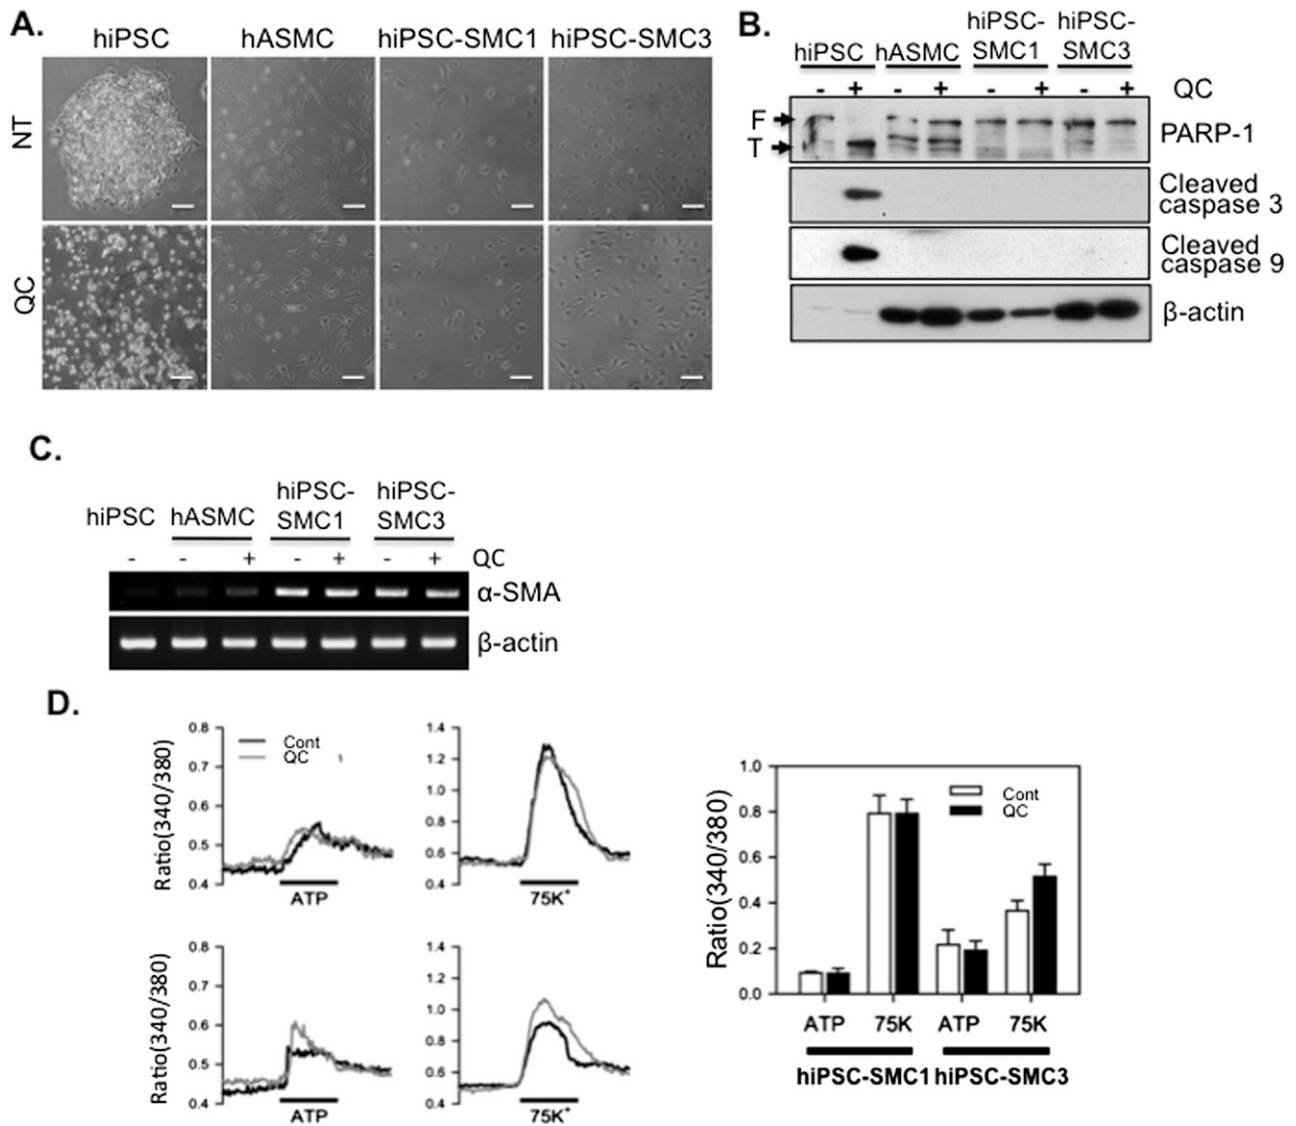

**Fig. 54.** Undifferentiated induced pluripotent stem cells (iPSCs) selectively undergo cell death in response to QC, whereas their differentiated counterparts are unaffected. (A) Light microscopic images of undifferentiated iPSCs, human aortic vascular smooth-muscle cells (hASMCs), iPSC SMC1 (hiPSC-SMC1), and hiPSC-derived SMC3 (hiPSC-SMC3) incubated in the presence or absence of 50  $\mu$ M QC for 16 h. (Scale bars, 200  $\mu$ m.) (B) Levels of PARP-1 cleavage (F, full length; T, truncated), cleaved caspase-3, and cleaved caspase-9 were determined by immunoblotting. Beta-actin was used as loading control. (C) The level of  $\alpha$ -SMA mRNA was determined by RT-PCR. Beta-actin was used as loading control. (D) Relative change in intracellular calcium levels in response to a pharmacological agonist, ATP (20 mM; *Left*) or membrane depolarization (75 mM  $K^+$ ; *Right*) in hiPSC-SMC1 (*Upper*) and hiPSC-SMC3 (*Right*) cells. The calcium response was tested before (black line) and after (gray line) treatment with 50 mM QC for 6 h, as described in *Materials and Methods*. Treatment with ATP or 75 mM  $K^+$  is indicated by the black bar at the bottom of each panel. Net changes in intracellular calcium after treatment with ATP (white) or 75 mM  $K^+$  (black). Changes in calcium level were expressed as the ratio (340/380) of Fura-2 emissions. Means  $\pm$  SEM;  $n = 18$ –23.

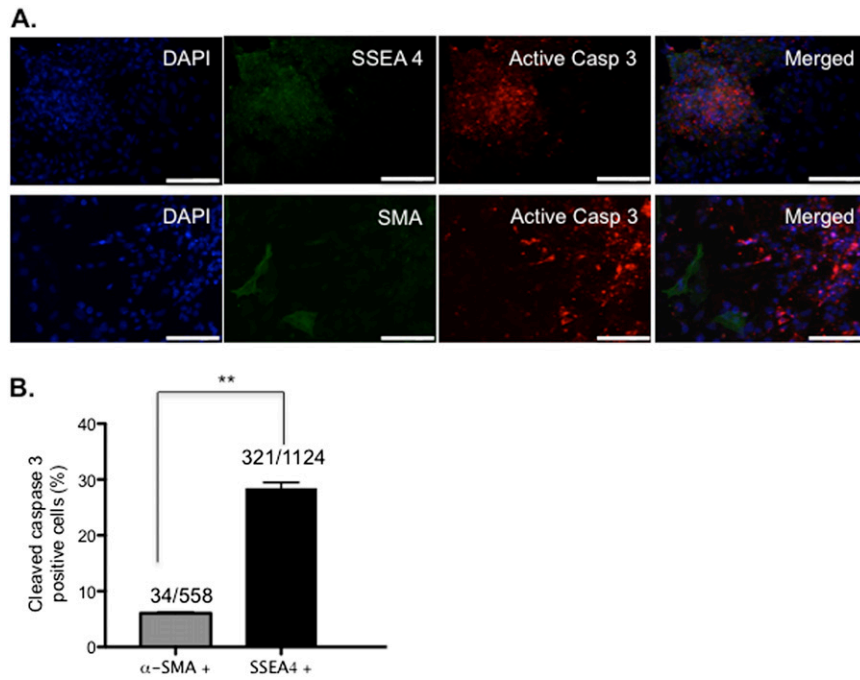

**Fig. S5.** (A) hiPSCs and smooth muscle cells derived from hiPSCs (SMC3) was mixed to 1:1 and were treated with 50  $\mu$ M of QC for 24 h, followed by immunostaining analysis with SSEA-4 (green) and active caspase-3 (red) (Upper) or SMA (green) and active caspase-3 (red) (Lower). (Scale bars, 100  $\mu$ m.) (B) Percentage of active caspase-3-positive population from either SMA-positive population or SSEA-3-positive population was determined by counting more than 500–800 cells and was graphically presented.  $**P < 0.01$ .

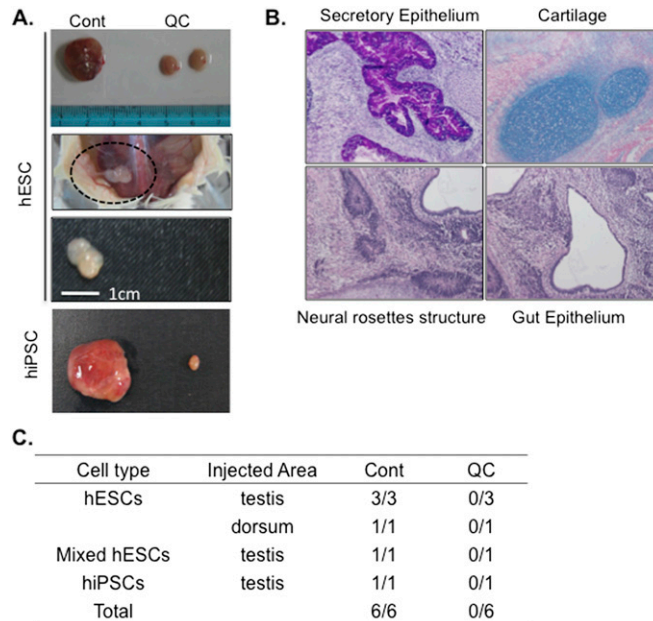

**Fig. S6.** (A) Representative images of teratomas formed by hESC and hiPSC in the presence or absence of a 50  $\mu$ M QC pretreatment. (B) Teratomas sections generated by hESCs are shown stained with H&E, Masson's trichrome, and Alcian Blue. Teratomas produced cells indicative of gut epithelium, cartilage, secretory epithelium, and neural rosette structures. (C) Summary of teratoma formation with or without QC under three different conditions.

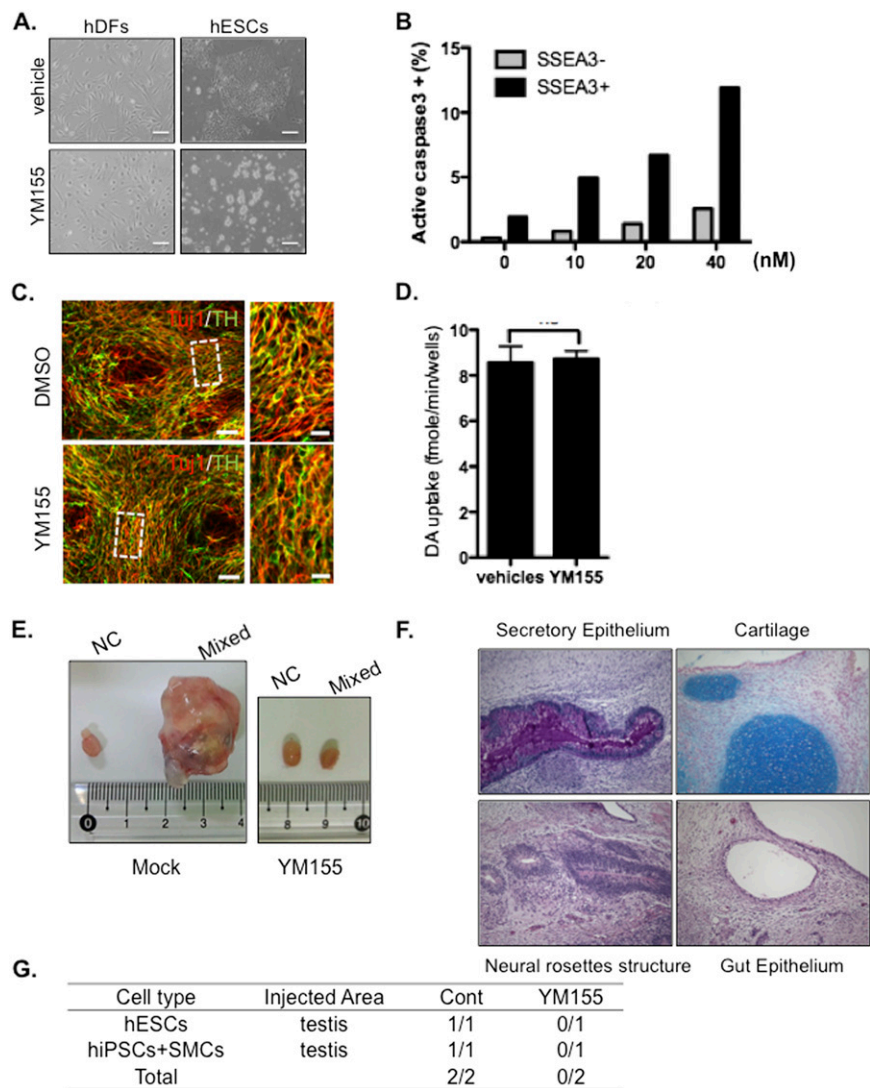

**Fig. S7.** (A) Light microscopic images of undifferentiated hESCs and fully differentiated human dermal fibroblast (hDF) treated with or without 10 nM of YM155. (Scale bars, 200  $\mu$ m.) (B) Caspase-3 activity of hESCs and hDFs in response to treatment with the indicated dose of YM155 was determined using a caspase-3 activity assay. (C) Dopaminergic neuronal cells derived from hESCs were treated with 10 nM of YM155 or vehicle for 24 h and then subjected to dual immunostaining with Tuj (red) and TH (green) (*Left*). (D) Dopamine uptake of dopaminergic neuronal cells treated with 10 nM of YM155 or vehicle (DMSO) for 24 h was determined by measuring incorporation of [ $^3$ H]-labeled dopamine using liquid scintillation counting. ns, not significant. (E) A 1:1 mixture of hiPSCs and SMCs was injected into mouse testes. Representative images of teratomas formed in mouse testes injected with hESCs without (mock) or with 10 nM YM155 pretreatment (YM155). NC, no cells injected. (F) Teratomas sections generated by hESCs are shown stained with H&E, Masson's trichrome, and Alcian Blue. Teratomas produced cells indicative of gut epithelium, cartilage, secretory epithelium, and neural rosette structures. (G) Summary of teratoma formation with or without YM155 under three different conditions.

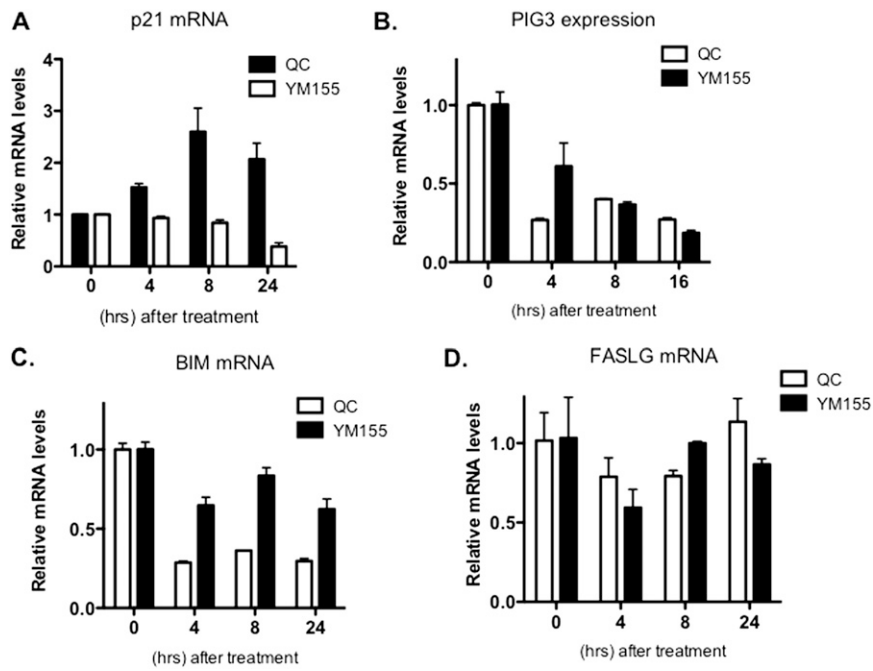

**Fig. 58.** hESCs were treated with 50  $\mu$ M of QC or 10 nM of YM155 and were harvested at indicated times. p21CIP1 (A), p53 inducible gene 3 (PIG3) (B), Bcl2-interacting mediator of cell death (BIM) (C), and Fas-ligand (FASLG) (D) mRNA expression level was determined by real-time PCR analysis.

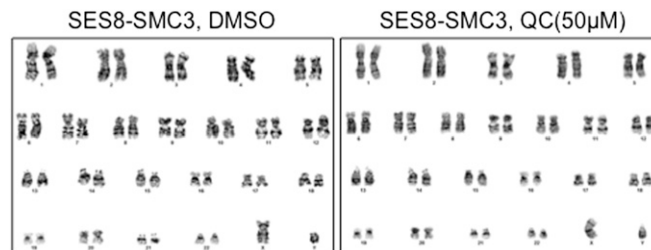

**Fig. 59.** Smooth muscle cells derived from hiPSCs (SMC3) were treated with 50  $\mu$ M of QC for 24 h and were subjected to karyotyping analysis. Normal karyotyping (44+XY) after QC treatment.



**Table S1. Pro- or antiapoptotic genes in hESCs**

| Gene                       | Description                                                    | Undif  | Diff  | Undff/Diff |
|----------------------------|----------------------------------------------------------------|--------|-------|------------|
| <b>Proapoptotic genes</b>  |                                                                |        |       |            |
| PYCARD                     | PYD and CARD domain containing                                 | 0.6311 | 0.002 | 401.43     |
| DAPK1                      | Death-associated protein kinase 1                              | 0.4106 | 0.002 | 261.20     |
| CASP3                      | Caspase 3, apoptosis-related cysteine peptidase                | 0.2844 | 0.002 | 180.89     |
| APAF1                      | Apoptotic peptidase activating factor                          | 0.1412 | 0.002 | 89.82      |
| TP53BP2                    | Tumor protein p53 binding protein, 2                           | 0.1171 | 0.002 | 74.49      |
| HRK                        | Harakiri, BCL2 interacting protein                             | 0.0762 | 0.002 | 48.47      |
| BCL2L11                    | BCL2-like 11 (apoptosis facilitator)                           | 0.0731 | 0.002 | 46.49      |
| BNIP1                      | BCL2/adenovirus E1B 19kDa interacting protein 1                | 0.0663 | 0.002 | 42.19      |
| CRADD                      | CASP2 and RIPK1 domain containing adaptor with death domain    | 0.0598 | 0.002 | 38.03      |
| CD70                       | CD70 molecules                                                 | 0.0528 | 0.002 | 33.57      |
| CD40                       | CD40 molecules                                                 | 0.0420 | 0.002 | 26.70      |
| CD27                       | CD27 molecules                                                 | 0.0103 | 0.002 | 6.54       |
| CASP2                      | Caspase 2, apoptosis-related cysteine peptidase                | 0.0978 | 0.019 | 5.24       |
| CASP10                     | Caspase 10, apoptosis-related cysteine peptidase               | 0.0068 | 0.002 | 4.34       |
| HPRT1                      | Hypoxanthinephosphoribosyltransferase 1 (Lesch-Nyhan syndrome) | 1.0252 | 0.279 | 3.68       |
| CIDEB                      | Cell death-inducing DFFA-like effector b                       | 0.0650 | 0.023 | 2.846      |
| CARD8                      | Caspase recruitment domain family, member 8                    | 0.0044 | 0.002 | 2.77       |
| TP73                       | Tumor protein p73                                              | 0.0043 | 0.002 | 2.71       |
| TRAF2                      | TNF receptor-associated factor 2                               | 0.1578 | 0.062 | 2.57       |
| TNFRSF25                   | Tumor necrosis factor receptor superfamily, member 25          | 0.0171 | 0.007 | 2.55       |
| TP53                       | Tumor protein p53 (Li-Fraumeni syndrome)                       | 1.1064 | 0.479 | 2.31       |
| CASP9                      | Caspase 9, apoptosis-related cysteine peptidase                | 0.2111 | 0.097 | 2.17       |
| <b>Antiapoptotic genes</b> |                                                                |        |       |            |
| BCL10                      | B-cell CLL/lymphoma 10                                         | 0.0016 | 0.223 | 141.93     |
| BCL2L2                     | BCL2-like 2                                                    | 0.0016 | 0.068 | 43.38      |
| BRAF                       | V-raf murine sarcoma viral oncogene homolog B1                 | 0.0042 | 0.039 | 9.38       |
| BAG1                       | BCL2-associated athanogene                                     | 0.0016 | 0.010 | 6.32       |
| DFFA                       | DNA fragmentation factor, 45kDa, alpha polypeptide             | 0.2787 | 1.533 | 5.50       |
| BAG4                       | BCL2-associated athanogene 4                                   | 0.0500 | 0.185 | 3.70       |
| MCL1                       | Myeloid cell leukemia sequence 1 (BCL2-related)                | 0.3384 | 0.856 | 2.53       |
| BFAR                       | Bifunctional apoptosis regulator                               | 0.1365 | 0.318 | 2.33       |
| BCL2                       | B-cell CLL/lymphoma 2                                          | 0.0037 | 0.008 | 2.07       |
| BIRC6                      | Baculoviral IAP repeat-containing 6                            | 0.0182 | 0.038 | 2.07       |

**Table S2. List of cells in a database library**

| ESC lines                 | Adult stem cells                                         | Normal cells                                       |
|---------------------------|----------------------------------------------------------|----------------------------------------------------|
| hESCs (H9)                | T Lymphocyte (CD3- CD4+ CD8+) of peripheral blood        | Extravillous trophoblast cell line HTR-8_SVneo     |
| Embryoid body cell (H9)   | pre-T Lymphocyte of thymus(DN3)                          | Extravillous trophoblast cell line SGHPL-5         |
| Embryonic blast cell (H9) | T Lymphocyte (CD3+ CD4+ CD8+) of peripheral blood        | Pharyngeal epithelial cancer cell line Detroit 562 |
| hESCs (ES4)               | pro-T Lymphocyte of thymus(DN1+DN2)                      | Kidney epithelial cell line HEK-293                |
| hESCs (ES2)               | Immature single positive T lymphocyte                    | Breast epithelial cell line HMEC                   |
| hESCs (HUES8)             | T Lymphocyte (CD4+) of peripheral blood                  | Neonatal melanocyte cell line HEM-N                |
| hESCs (HD129)             | T Lymphocyte (CD8+) of peripheral blood                  | Melanocyte cell line HEM-LP                        |
| hESCs (HS181)             | Erythroblast of peripheral blood                         | Melanocyte cell line Hermes 2B                     |
| hESCs (H7)                | Myeloblast of bone marrow                                | Melanocyte cell line Hermes 1                      |
| hESCs (H14A)              | Monoblast of peripheral blood                            | Embryonic skin fibroblast D551 cell line           |
| hESCs (H13B)              | Neutrophil of peripheral blood                           | Skin keratinocyte HaCaT cell line                  |
| hESCs (HD90)              | Megakaryoblast of peripheral blood                       | Lung fibroblast cell line WI-38                    |
| hESCs (H14)               | Monocyte of peripheral blood                             | Fibroblast of skin cell line GM-5659               |
| hESCs (HS235)             | Granulocyte-macrophage progenitor cell of bone marrow    | Umbilical vein cell line HUVEC                     |
| hESCs (HD83)              | Common myeloid progenitor cell of bone marrow            | Neonatal foreskin keratinocyte NHEK cell line      |
| hESCs (H9)                | Megakaryocyte-erythrocyte progenitor cell of bone marrow | Testis fibroblast cell line Hs 1.Tes               |
| hESCs (H13)               | Hematopoietic stem cell of bone marrow                   |                                                    |
| hESCs (Cythera)           | Eosinophil of peripheral blood                           |                                                    |
| hESCs (HUES6)             | Basophil of peripheral blood                             |                                                    |
| hESCs (VUB01)             | hESCs (H9)                                               |                                                    |
| hESCs (BG01)              | Embryoid body cell (H9)                                  |                                                    |
| hESCs (CSES4)             | Embryonic blast cell (H9)                                |                                                    |
| hESCs (H1)                | Keratinocyte of foreskin                                 |                                                    |
| hESCs (T3)                | Transit-amplifying cell of skin                          |                                                    |
| hESCs (SA01)              | Keratinocyte stem cell                                   |                                                    |
| hESCs (WIBR2)             | Tubular progenitor cell of kidney                        |                                                    |
| hESCs (WIBR1)             | Glomerular progenitor cell of kidney                     |                                                    |
| hESCs (WIBR3)             | Ovarian surface epithelial cell                          |                                                    |
|                           | Adipose stem cell                                        |                                                    |
